# Supplementary material for: The BDS checklist as measure of illness severity: a cross-sectional cohort study in the Danish general population, primary care and specialised setting
Source: PubMed Central journal article supplement — BMJ Open. 2020 Dec 10;10(12):e042880. doi: 10.1136/bmjopen-2020-042880 (PMC7733181; doi:10.1136/bmjopen-2020-042880), 2020-12-10
Supplement: bmjopen-2020-042880supp001.pdf [file bmjopen-2020-042880supp001.pdf]

## Appendix A: The 25-items BDS checklist

| During the last 4 weeks*,<br>have you been bothered by... |                                                               | Not at all               | A bit                    | Somewhat                 | Quite a bit              | A lot                    |
|-----------------------------------------------------------|---------------------------------------------------------------|--------------------------|--------------------------|--------------------------|--------------------------|--------------------------|
| 1                                                         | Palpations and heart pounding                                 | <input type="checkbox"/> |
| 2                                                         | Precordial discomfort                                         | <input type="checkbox"/> |
| 3                                                         | Breathlessness without exertion                               | <input type="checkbox"/> |
| 4                                                         | Hyperventilation                                              | <input type="checkbox"/> |
| 5                                                         | Hot and cold sweats                                           | <input type="checkbox"/> |
| 6                                                         | Dry mouth                                                     | <input type="checkbox"/> |
| 7                                                         | Frequent loose bowel movements                                | <input type="checkbox"/> |
| 8                                                         | Abdominal pains                                               | <input type="checkbox"/> |
| 9                                                         | Feeling bloated/full of gas/distended                         | <input type="checkbox"/> |
| 10                                                        | Diarrhoea                                                     | <input type="checkbox"/> |
| 11                                                        | Regurgitations                                                | <input type="checkbox"/> |
| 12                                                        | Nausea                                                        | <input type="checkbox"/> |
| 13                                                        | Burning sensation of the upper part<br>of stomach/epigastrium | <input type="checkbox"/> |
| 14                                                        | Pains in arms or legs                                         | <input type="checkbox"/> |
| 15                                                        | Muscular aches or pains                                       | <input type="checkbox"/> |
| 16                                                        | Pains in the joints                                           | <input type="checkbox"/> |
| 17                                                        | Feeling of paresis or localized<br>weakness                   | <input type="checkbox"/> |
| 18                                                        | Back ache                                                     | <input type="checkbox"/> |
| 19                                                        | Pain moving from one place to<br>another                      | <input type="checkbox"/> |
| 20                                                        | Unpleasant numbness or tingling<br>sensations                 | <input type="checkbox"/> |
| 21                                                        | Concentration difficulties                                    | <input type="checkbox"/> |
| 22                                                        | Excessive fatigue                                             | <input type="checkbox"/> |
| 23                                                        | Headache                                                      | <input type="checkbox"/> |
| 24                                                        | Impairment of memory                                          | <input type="checkbox"/> |
| 25                                                        | Dizziness                                                     | <input type="checkbox"/> |

\* This time frame was changed to 12 months in the general population cohort

## Appendix B: Illustrations of the theoretical models of confirmatory factor analyses

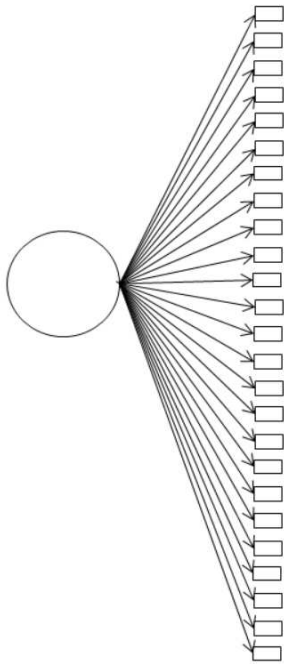

One-level one factor model

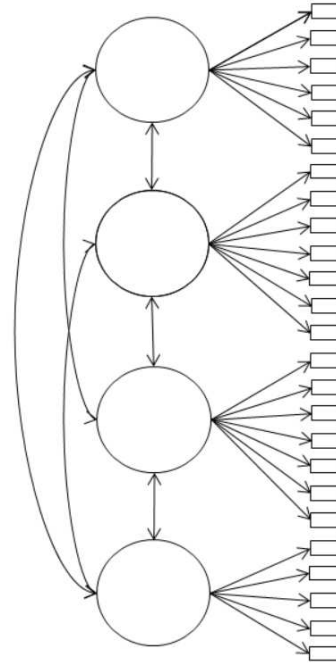

One-level four factor model

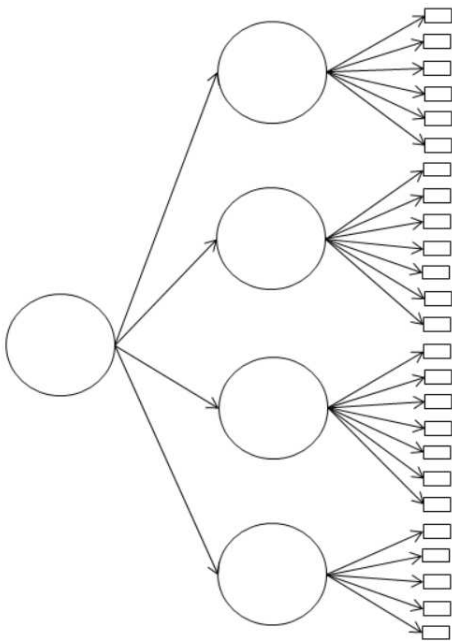

Two-level four factor model

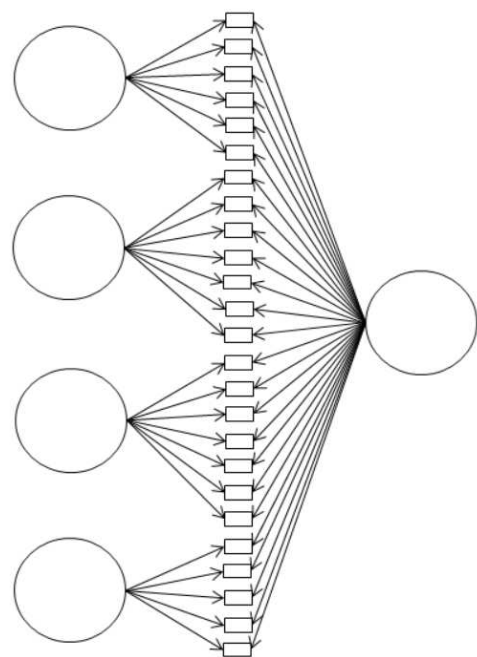

Bi-factor model

## Appendix C: Descriptive plots of associations between the BDS checklist and other measures

### General population

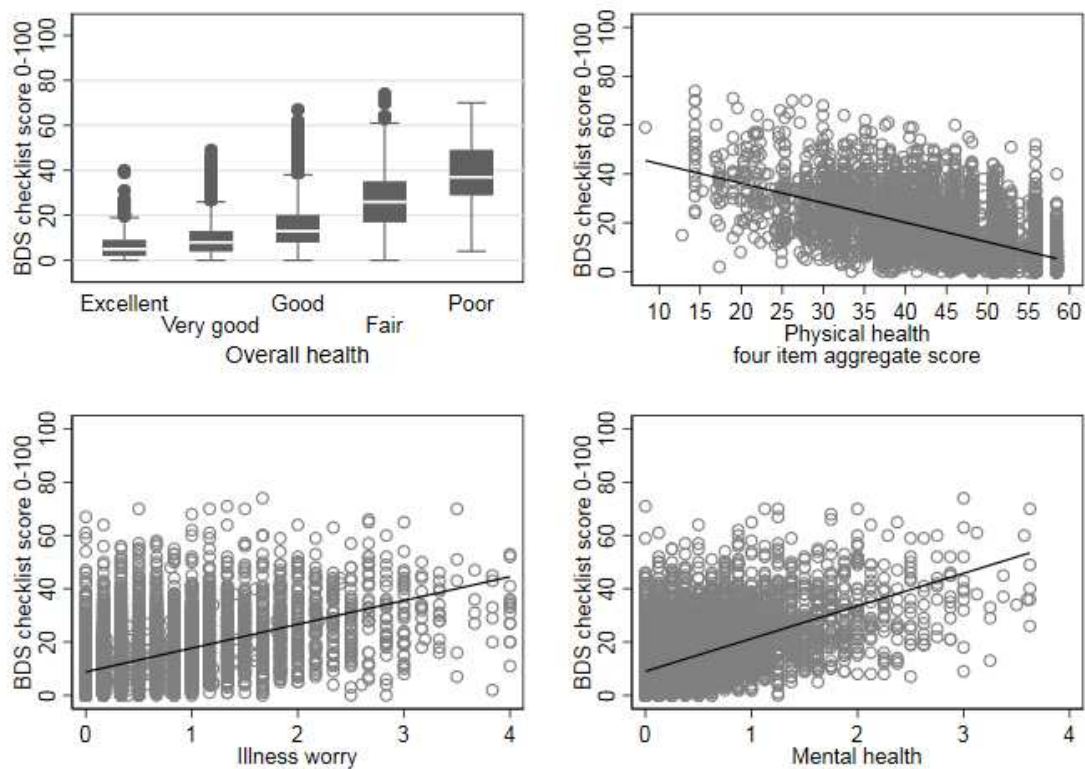

Correlation of the BDS checklist score and measures of overall health, perceived physical health, illness worry, and mental health in the general population cohort.

## Primary care

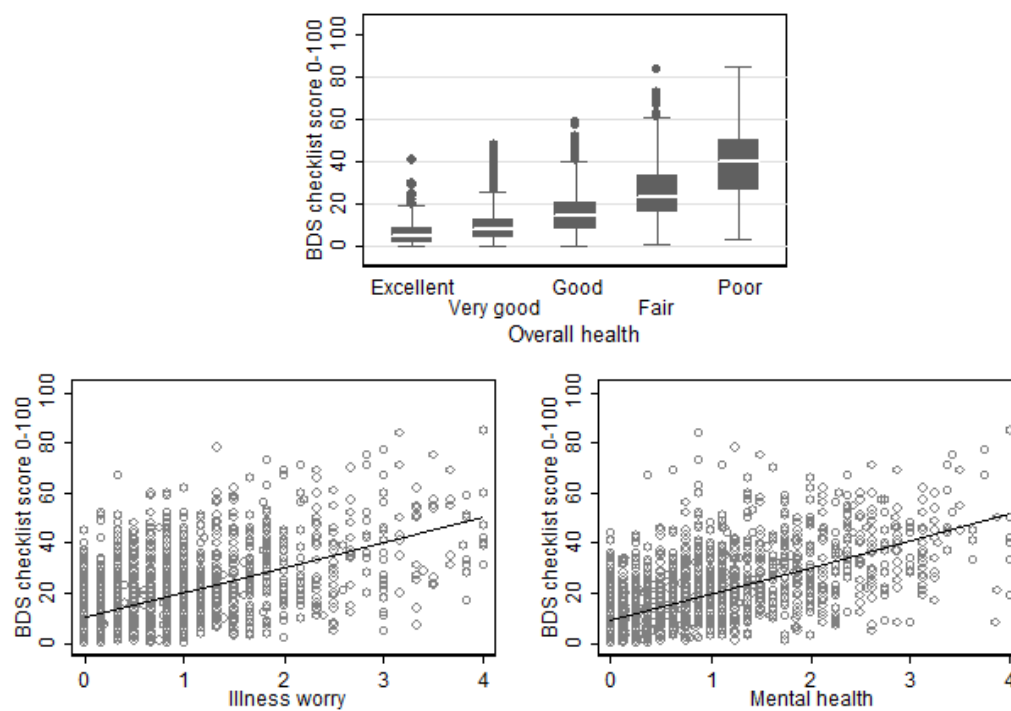

Correlation of the BDS checklist score and measures of overall health, illness worry, and mental health in the primary care cohort.

### Specialized setting

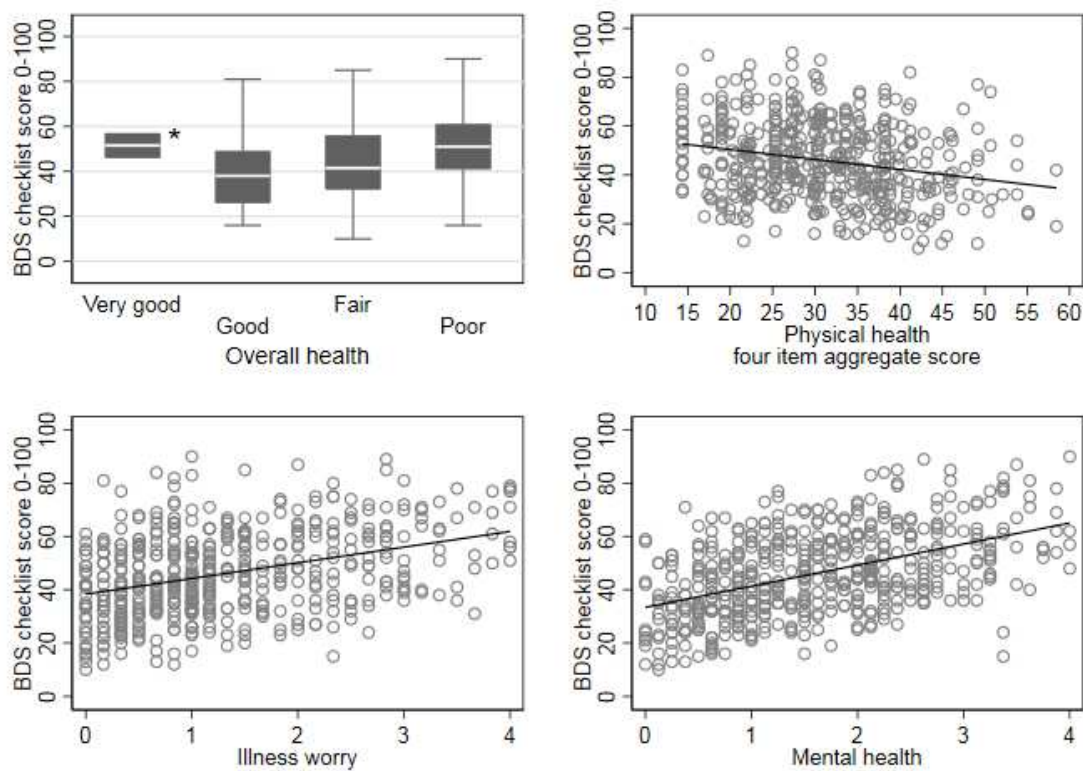

Correlation of the BDS checklist score and measures of overall health, perceived physical health, illness worry, and mental health in the cohort from specialized setting.

\* Only based on two individuals

## Appendix D. Data across sex and age groups

**Table 1: Data for the general population cohort (n=9656): Cummulative percentages**

|                         | Male            |                |                  |                  | Female         |                  |                  |                  |
|-------------------------|-----------------|----------------|------------------|------------------|----------------|------------------|------------------|------------------|
|                         | 18-39<br>N= 719 | 40-49<br>N=902 | 50-59<br>N=1.130 | 60-76<br>N=1.702 | 18-39<br>N=905 | 40-49<br>N=1.139 | 50-59<br>N=1.401 | 60-76<br>N=1.758 |
| <b>BDS score groups</b> |                 |                |                  |                  |                |                  |                  |                  |
| 0-                      | 21              | 24             | 25               | 28               | 10             | 15               | 10               | 18               |
| 5-                      | 50              | 55             | 54               | 55               | 34             | 38               | 33               | 42               |
| 10-                     | 73              | 76             | 71               | 75               | 56             | 59               | 56               | 62               |
| 15-                     | 85              | 86             | 82               | 86               | 72             | 73               | 71               | 76               |
| 20-                     | 91              | 92             | 88               | 91               | 83             | 82               | 82               | 85               |
| 25-                     | 95              | 95             | 93               | 94               | 90             | 89               | 88               | 91               |
| 30-                     | 97              | 97             | 96               | 97               | 94             | 93               | 93               | 94               |
| 35-                     | 98              | 97             | 97               | 98               | 96             | 95               | 96               | 96               |
| 40-                     | 99              | 98             | 98               | 98               | 97             | 97               | 97               | 98               |
| 45-                     | 99              | 99             | 99               | 99               | 98             | 98               | 98               | 99               |
| 50-                     | 99              | 99             | 99               | 99               | 98             | 99               | 99               | 99               |
| 55-                     | 99              | 99             | 99               | 99               | 99             | 99               | 99               | 99               |
| 60-                     | 99              | 99             | 99               | 99               | 99             | 99               | 100              | 99               |
| 65-                     | 99              | 99             | 99               | 99               | 99             | 99               | 100              | 99               |
| 70-                     | 99              | 99             | 99               | 99               | 99             | 99               | 100              | 99               |
| 75-                     | 99              | 99             | 99               | 99               | 99             | 99               | 100              | 99               |
| 80-                     | 99              | 99             | 99               | 99               | 99             | 99               | 100              | 99               |
| 85-                     | 99              | 99             | 99               | 99               | 99             | 99               | 100              | 99               |
| 90-                     | 99              | 99             | 99               | 99               | 99             | 99               | 100              | 99               |
| 95-                     | 99              | 99             | 99               | 99               | 99             | 99               | 100              | 99               |
| Missing                 | 100             | 100            | 100              | 100              | 100            | 100              | 100              | 100              |

**Abbreviations:** BDS=Bodily distress syndrome

**Table 2: Data for the primary care cohort (n=2480): Cummulative percentages**

|                         | Male           |                |                 |                |                |             | Female         |                |                |                |                |              |
|-------------------------|----------------|----------------|-----------------|----------------|----------------|-------------|----------------|----------------|----------------|----------------|----------------|--------------|
|                         | 18-39<br>N=146 | 40-49<br>N=147 | 50-59<br>N= 172 | 60-76<br>N=245 | 70-79<br>N=153 | 80-<br>N=67 | 18-39<br>N=404 | 40-49<br>N=280 | 50-59<br>N=271 | 60-69<br>N=287 | 70-79<br>N=203 | 80-<br>N=105 |
| <b>BDS score groups</b> |                |                |                 |                |                |             |                |                |                |                |                |              |
| 0-                      | 23             | 20             | 16              | 18             | 14             | 10          | 16             | 14             | 8              | 16             | 14             | 9            |
| 5-                      | 49             | 37             | 32              | 40             | 35             | 36          | 37             | 31             | 23             | 32             | 31             | 27           |
| 10-                     | 67             | 60             | 52              | 58             | 54             | 51          | 53             | 47             | 38             | 45             | 45             | 42           |
| 15-                     | 73             | 70             | 67              | 72             | 65             | 58          | 66             | 59             | 54             | 58             | 59             | 55           |
| 20-                     | 79             | 80             | 76              | 83             | 72             | 67          | 76             | 75             | 66             | 73             | 72             | 64           |
| 25-                     | 89             | 86             | 82              | 90             | 79             | 82          | 80             | 80             | 78             | 82             | 79             | 70           |
| 30-                     | 92             | 89             | 87              | 95             | 82             | 82          | 86             | 84             | 85             | 85             | 85             | 72           |
| 35-                     | 93             | 91             | 90              | 96             | 88             | 85          | 90             | 88             | 89             | 89             | 88             | 74           |
| 40-                     | 97             | 93             | 94              | 98             | 91             | 87          | 93             | 90             | 92             | 93             | 90             | 76           |
| 45-                     | 97             | 94             | 96              | 98             | 94             | 88          | 95             | 94             | 95             | 95             | 91             | 78           |
| 50-                     | 98             | 95             | 98              | 98             | 95             | 88          | 96             | 96             | 96             | 96             | 93             | 80           |
| 55-                     | 99             | 98             | 98              | 100            | 95             | 88          | 96             | 97             | 97             | 97             | 94             | 81           |
| 60-                     | 99             | 99             | 98              | 100            | 95             | 88          | 97             | 98             | 97             | 97             | 95             | 82           |
| 65-                     | 99             | 99             | 99              | 100            | 95             | 88          | 97             | 98             | 97             | 98             | 96             | 83           |
| 70-                     | 99             | 99             | 99              | 100            | 95             | 88          | 98             | 98             | 98             | 98             | 96             | 83           |
| 75-                     | 99             | 99             | 99              | 100            | 95             | 88          | 98             | 98             | 98             | 98             | 96             | 83           |
| 80-                     | 99             | 99             | 99              | 100            | 95             | 88          | 98             | 98             | 99             | 98             | 96             | 83           |
| 85-                     | 99             | 99             | 99              | 100            | 95             | 88          | 98             | 99             | 99             | 98             | 96             | 83           |
| 90-                     | 99             | 99             | 99              | 100            | 95             | 88          | 98             | 99             | 99             | 98             | 96             | 83           |
| 95-                     | 99             | 99             | 99              | 100            | 95             | 88          | 98             | 99             | 99             | 98             | 96             | 83           |
| Missing                 | 100            | 100            | 100             | 100            | 100            | 100         | 100            | 100            | 100            | 100            | 100            | 100          |

**Abbreviations:** BDS=Bodily distress syndrome

**Table 3: Data for the cohort from specialized setting (n=492): Cummulative percentages**

|                         | Male          |               |               |              | Female         |                |               |              |
|-------------------------|---------------|---------------|---------------|--------------|----------------|----------------|---------------|--------------|
|                         | 18-39<br>N=42 | 40-49<br>N=40 | 50-59<br>N=11 | 60-69<br>N=0 | 18-39<br>N=199 | 40-49<br>N=162 | 50-59<br>N=36 | 60-69<br>N=2 |
| <b>BDS score groups</b> |               |               |               |              |                |                |               |              |
| 0-                      | 0             | 0             | 0             | -            | 0              | 0              | 0             | 0            |
| 5-                      | 0             | 0             | 0             | -            | 0              | 0              | 0             | 0            |
| 10-                     | 0             | 3             | 0             | -            | 2              | 1              | 0             | 0            |
| 15-                     | 5             | 5             | 9             | -            | 4              | 2              | 3             | 0            |
| 20-                     | 12            | 15            | 9             | -            | 8              | 7              | 6             | 0            |
| 25-                     | 21            | 23            | 9             | -            | 14             | 13             | 14            | 0            |
| 30-                     | 36            | 45            | 36            | -            | 20             | 25             | 17            | 50           |
| 35-                     | 48            | 50            | 55            | -            | 36             | 35             | 19            | 50           |
| 40-                     | 57            | 55            | 73            | -            | 50             | 48             | 25            | 50           |
| 45-                     | 74            | 60            | 82            | -            | 60             | 59             | 36            | 50           |
| 50-                     | 81            | 70            | 82            | -            | 68             | 69             | 56            | 50           |
| 55-                     | 86            | 85            | 82            | -            | 79             | 75             | 72            | 50           |
| 60-                     | 90            | 88            | 82            | -            | 87             | 84             | 83            | 100          |
| 65-                     | 95            | 93            | 82            | -            | 92             | 92             | 83            | 100          |
| 70-                     | 95            | 98            | 91            | -            | 95             | 96             | 94            | 100          |
| 75-                     | 95            | 100           | 100           | -            | 96             | 99             | 97            | 100          |
| 80-                     | 95            | 100           | 100           | -            | 99             | 99             | 97            | 100          |
| 85-                     | 100           | 100           | 100           | -            | 100            | 100            | 97            | 100          |
| 90-                     | 100           | 100           | 100           | -            | 100            | 100            | 97            | 100          |
| 95-                     | 100           | 100           | 100           | -            | 100            | 100            | 97            | 100          |
| Missing                 | 100           | 100           | 100           | -            | 100            | 100            | 100           | 100          |

**Abbreviations:** BDS=Bodily distress syndrome



**Table 4: Data for the three pooled cohorts (n=12628): Cumulative percentages**

|                         | Male           |                 |                 |                 |                |             | Female          |                 |                 |                 |                |              |
|-------------------------|----------------|-----------------|-----------------|-----------------|----------------|-------------|-----------------|-----------------|-----------------|-----------------|----------------|--------------|
|                         | 18-39<br>N=907 | 40-49<br>N=1089 | 50-59<br>N=1313 | 60-69<br>N=1665 | 70-79<br>N=435 | 80-<br>N=67 | 18-39<br>N=1508 | 40-49<br>N=1581 | 50-59<br>N=1708 | 60-69<br>N=1785 | 70-79<br>N=465 | 80-<br>N=105 |
| <b>BDS score groups</b> |                |                 |                 |                 |                |             |                 |                 |                 |                 |                |              |
| 0-                      | 20             | 23              | 24              | 26              | 26             | 10          | 10              | 13              | 9               | 18              | 15             | 9            |
| 5-                      | 47             | 51              | 50              | 52              | 50             | 36          | 31              | 33              | 31              | 41              | 37             | 27           |
| 10-                     | 69             | 71              | 68              | 71              | 70             | 51          | 48              | 51              | 52              | 59              | 53             | 42           |
| 15-                     | 80             | 81              | 80              | 83              | 80             | 58          | 61              | 63              | 67              | 73              | 67             | 55           |
| 20-                     | 86             | 88              | 86              | 90              | 86             | 67          | 71              | 73              | 78              | 83              | 79             | 64           |
| 25-                     | 91             | 91              | 91              | 94              | 89             | 82          | 77              | 80              | 85              | 89              | 85             | 70           |
| 30-                     | 94             | 94              | 94              | 97              | 91             | 82          | 82              | 84              | 90              | 93              | 89             | 72           |
| 35-                     | 95             | 95              | 96              | 98              | 94             | 85          | 86              | 88              | 93              | 95              | 92             | 74           |
| 40-                     | 97             | 96              | 97              | 99              | 95             | 87          | 90              | 91              | 95              | 97              | 94             | 76           |
| 45-                     | 97             | 97              | 98              | 99              | 97             | 88          | 92              | 93              | 96              | 98              | 95             | 78           |
| 50-                     | 98             | 97              | 99              | 99              | 97             | 88          | 94              | 95              | 98              | 99              | 96             | 80           |
| 55-                     | 98             | 98              | 99              | 99              | 97             | 88          | 95              | 96              | 98              | 99              | 97             | 81           |
| 60-                     | 99             | 99              | 99              | 99              | 97             | 88          | 97              | 97              | 99              | 99              | 97             | 82           |
| 65-                     | 99             | 99              | 99              | 99              | 97             | 88          | 98              | 98              | 99              | 99              | 98             | 83           |
| 70-                     | 99             | 99              | 99              | 99              | 97             | 88          | 98              | 99              | 99              | 99              | 98             | 83           |
| 75-                     | 99             | 99              | 99              | 99              | 97             | 88          | 99              | 99              | 99              | 99              | 98             | 83           |
| 80-                     | 99             | 99              | 99              | 99              | 97             | 88          | 99              | 99              | 99              | 99              | 98             | 83           |
| 85-                     | 99             | 99              | 99              | 99              | 97             | 88          | 99              | 99              | 99              | 99              | 98             | 83           |
| 90-                     | 99             | 99              | 99              | 99              | 97             | 88          | 99              | 99              | 99              | 99              | 98             | 83           |
| 95-                     | 99             | 99              | 99              | 99              | 97             | 88          | 99              | 99              | 99              | 99              | 98             | 83           |
| Missing                 | 100            | 100             | 100             | 100             | 100            | 100         | 100             | 100             | 100             | 100             | 100            | 100          |

**Abbreviations:** BDS=Bodily distress syndrome
